# Supplementary material
Source: PubMed Central journal article supplement (PMC2715798)
Supplement: supp_29_15_4091__1.pdf [file supp_29_15_4091__1.pdf]

**TABLE S1. Yeast two-hybrid screen results.**

| <b>ERR<math>\alpha</math>-interacting Clones</b> | <b>Number</b> |
|--------------------------------------------------|---------------|
| ERR $\alpha$                                     | 12            |
| AKAP1                                            | 10            |
| Zinedin                                          | 10            |
| SRC1                                             | 5             |
| I $\kappa$ B $\alpha$                            | 4             |
| CBF1 interacting corepressor (CIR)               | 1             |
| Clones without ORF                               | 4             |

Numbers represent redundancies.

**TABLE S2. Metabolic gene expression array results for Bcl3-regulated genes in cardiac myocytes**

| <b>Glycolysis</b>                                                            | <b>Fold Induction</b> |
|------------------------------------------------------------------------------|-----------------------|
| Ketohexokinase (Khk)                                                         | 2.5                   |
| 6-phosphofructo-2-kinase/fructose-2,6-biphosphatase 2 (Pfkfb2)               | 2.4                   |
| 6-phosphofructo-2-kinase/fructose-2,6-biphosphatase 3 (Pfkfb3)               | 2.0                   |
| 6-phosphofructo-2-kinase/fructose-2,6-biphosphatase 4 (Pfkfb4)               | 2.2                   |
| Phosphofructokinase, muscle (PfkM)                                           | 2.5                   |
| Enolase 3, Beta (Eno3)                                                       | 5.6                   |
| Phosphoglycerate mutase 2 (Pgam2)                                            | 3.7                   |
| Phosphoglycerate mutase 5 (Pgam5)                                            | 2.1                   |
| Glyceraldehyde-3-phosphate dehydrogenase (Gapd)                              | 2.0                   |
| Lactate dehydrogenase D (Ldhd)                                               | 2.0                   |
| <b>Other glucose metabolism</b>                                              |                       |
| Pyruvate dehydrogenase kinase 4 (Pdk4)                                       | 4.1                   |
| Pyruvate dehydrogenase kinase 3 (Pdk3)                                       | 2.2                   |
| Solute carrier family 2 (facilitated glucose transporter), member 4 (Slc2a4) | 2.2                   |
| Solute carrier family 2 (facilitated glucose transporter), member 3 (Slc2a3) | 2.6                   |
| <b>Fatty acid binding proteins</b>                                           |                       |
| Fatty acid binding protein 3 (Fabp3)*                                        | 2.4                   |
| <b>Mitochondrial fatty acid oxidation (<math>\beta</math>-oxidation)</b>     |                       |
| Acyl-CoA synthetase long-chain family member 1 (Acsl1)                       | 2.0                   |
| Acyl-CoA synthetase long-chain family member 3 (Acsl3)                       | 2.1                   |
| Acyl-CoA Oxidase 2, branch-chain (Acox2)                                     | 6.0                   |
| Carnitine O-octanoyltransferase (Crot)                                       | 2.0                   |
| Carnitine palmitoyltransferase 1b, muscle (Cpt1b)                            | 3.0                   |
| Carnitine palmitoyltransferase 1a, liver (Cpt1a)                             | 2.2                   |
| Acyl-Coenzyme A dehydrogenase, very long chain (Acadvl)*                     | 2.0                   |

|                                                                                                                                                              |            |
|--------------------------------------------------------------------------------------------------------------------------------------------------------------|------------|
| <b>Acyl-Coenzyme A dehydrogenase family, member 11, predicted<br/>(Aad11 predicted)</b>                                                                      | <b>2.0</b> |
| <b>Acyl-Coenzyme A dehydrogenase, medium chain (Acadm)*</b>                                                                                                  | <b>2.3</b> |
| <b>Hydroxyacyl-Coenzyme A dehydrogenase/3-ketoacyl-Coenzyme A<br/>thiolase/enoyl-Coenzyme A hydratase, trifunctional protein, alpha<br/>Subunit (Hadha)*</b> | <b>2.0</b> |
| <b>Hydroxyacyl-Coenzyme A dehydrogenase type II (Hadh2)</b>                                                                                                  | <b>2.0</b> |
| <b>2,4-dienoyl CoA reductase 1, mitochondrial (Decr1)</b>                                                                                                    | <b>2.2</b> |
| <hr/> <b>Peroxisomal fatty acid oxidation (<math>\alpha</math>-oxidation)</b> <hr/>                                                                          |            |
| <b>Phytanoyl-CoA hydroxylase (Phyh)</b>                                                                                                                      | <b>2.3</b> |
| <hr/> <b>Fatty acid and triacylglycerol synthesis</b> <hr/>                                                                                                  |            |
| <b>Acyl-CoA Synthetase short-chain member 1, predicted (Acss1 predicted)</b>                                                                                 | <b>6.0</b> |
| <b>Fatty acid synthase (Fasn)</b>                                                                                                                            | <b>2.4</b> |
| <b>Elongation of long chain fatty acids, ELOVL family member 6 (Elovl6)</b>                                                                                  | <b>2.0</b> |
| <b>Fatty acid desaturase 3 (Fads3)</b>                                                                                                                       | <b>2.1</b> |
| <b>Stearoyl-Coenzyme A desaturase 1 (Scd1)</b>                                                                                                               | <b>2.2</b> |
| <b>Stearoyl-Coenzyme A desaturase 2 (Scd2)*</b>                                                                                                              | <b>2.0</b> |
| <b>Glycerol-3-phosphate dehydrogenase 1 (Gpd1)</b>                                                                                                           | <b>2.1</b> |
| <b>Diacylglycerol O-acyltransferase homolog 2 mouse (Dgat2)</b>                                                                                              | <b>2.1</b> |
| <b>Glycerol-3-phosphate acyltransferase, mitochondrial (Gpam)</b>                                                                                            | <b>2.6</b> |
| <b>Diacylglycerol kinase, gamma (Dgkg)</b>                                                                                                                   | <b>2.0</b> |
| <b>1-acylglycerol-3-phosphate O-acyltransferase 6,<br/>lysophosphatidic acid acyltransferase, zeta (Agpat6)</b>                                              | <b>2.3</b> |
| <b>1-acylglycerol-3-phosphate O-acyltransferase 4,<br/>lysophosphatidic acid acyltransferase, delta (Agpat4)</b>                                             | <b>2.0</b> |
| <hr/> <b>Acyl-CoA metabolism</b> <hr/>                                                                                                                       |            |
| <b>Diazepam binding inhibitor (Dbi)</b>                                                                                                                      | <b>2.8</b> |
| <b>Cytosolic Acyl-CoA thioesterase 1 (Cte1)</b>                                                                                                              | <b>2.9</b> |

|                                                     |            |
|-----------------------------------------------------|------------|
| <b>Mitochondrial Acyl-CoA thioesterase 1 (Mte1)</b> | <b>2.5</b> |
| <b>Acyl-CoA thioesterase 7 (Acot7)</b>              | <b>2.0</b> |
| <b>Acyl-CoA thioesterase 8 (Acot8)</b>              | <b>2.1</b> |
| <b>Malonyl-CoA decarboxylase (Mlycd)</b>            | <b>2.7</b> |

---

#### **Sterol metabolism**

---

|                                                                                                 |            |
|-------------------------------------------------------------------------------------------------|------------|
| <b>Sterol-C5-desaturase , fungal ERG3,<br/>delta-5-desaturase, homolog ,S. cerevisae (Sc5d)</b> | <b>2.0</b> |
| <b>Oxysterol binding protein, predicted (Osbp predicted)</b>                                    | <b>2.8</b> |
| <b>Oxysterol binding protein-like 1A (Osbp1a)</b>                                               | <b>2.4</b> |
| <b>Oxysterol binding protein-like 6, predicted (Osbp16)</b>                                     | <b>3.1</b> |
| <b>Cholesterol 25-hydroxylase (Ch25h )</b>                                                      | <b>2.0</b> |
| <b>Sterol O-acyltransferase 1 (Soat1)</b>                                                       | <b>2.0</b> |
| <b>O-acyltransferase ,membrane bound, domain containing 2 (Oact2)</b>                           | <b>3.0</b> |
| <b>Oxidized low density lipoprotein , lectin-like, receptor 1 (Oldlr1)</b>                      | <b>2.0</b> |
| <b>Low density lipoprotein receptor-related protein associated protein 1 (Lrpap1)</b>           | <b>2.0</b> |
| <b>Lipolysis stimulated lipoprotein receptor (Lsr)</b>                                          | <b>2.9</b> |
| <b>Very low density lipoprotein receptor (Vldlr)*</b>                                           | <b>3.1</b> |

---

#### **Lipid metabolism (miscellaneous)**

---

|                                                                                                 |            |
|-------------------------------------------------------------------------------------------------|------------|
| <b>Serine palmitoyltransferase, long chain base subunit 1, predicted<br/>(Sptlc1 predicted)</b> | <b>2.0</b> |
| <b>Hormone sensitive lipase (Lipe)</b>                                                          | <b>7.9</b> |
| <b>Angiopoietin-like 4 (Angptl4)</b>                                                            | <b>4.2</b> |
| <b>Fibroblast growth factor 21 (Fgf21)</b>                                                      | <b>2.3</b> |
| <b>Peroxisomal biogenesis factor 12 (Pex12)</b>                                                 | <b>2.0</b> |
| <b>Peroxisomal biogenesis factor 6 (Pex6)</b>                                                   | <b>2.1</b> |
| <b>Peroxisomal biogenesis factor 11c, predicted (Pex11c)</b>                                    | <b>2.1</b> |
| <b>Adipose differentiation related protein (Adfp)</b>                                           | <b>2.0</b> |

---

#### **Glycogen metabolism**

---

|                                                                                              |            |
|----------------------------------------------------------------------------------------------|------------|
| <b>Phosphoglucomutase 1, predicted (Pgm1 predicted)</b>                                      | <b>2.0</b> |
| <b>Solute carrier family 37 (glycerol-6-phosphate transporter), member 4 (Slc37a4)</b>       | <b>2.6</b> |
| <hr/>                                                                                        |            |
| <b>Respiratory chain/Oxidative Phosphorylation (Ox-Phos)</b>                                 |            |
| <hr/>                                                                                        |            |
| <b>ATP synthase, H<sup>+</sup> transporting, mitochondrial F0 complex, subunit e (Atp5i)</b> | <b>2.0</b> |
| <b>Mitochondrial ATP synthase regulatory component factor B (Atp5s)</b>                      | <b>2.1</b> |
| <b>NADH dehydrogenase, ubiquinone, 1 alpha subcomplex, 2, predicted (Ndufa2 predicted)</b>   | <b>2.1</b> |
| <b>NADH dehydrogenase, ubiquinone, Fe-S protein 6 (Ndufs6)</b>                               | <b>2.3</b> |
| <b>NADH dehydrogenase, ubiquinone, 1 beta subcomplex, 5, predicted (Ndufb5 predicted)*</b>   | <b>2.5</b> |
| <b>Similar to NADH-ubiquinone oxidoreductase B9 subunit, Complex I-B9, CI-B9 (LOC691001)</b> | <b>2.0</b> |
| <b>NADH dehydrogenase, ubiquinone, flavoprotein 2 (Ndufv2)</b>                               | <b>2.1</b> |
| <b>NADH dehydrogenase, ubiquinone, flavoprotein 3-like (Ndufv3l)</b>                         | <b>2.1</b> |
| <b>Ubiquinol cytochrome c reductase core protein 2 (Uqcrc2)</b>                              | <b>2.0</b> |
| <b>Creatine kinase, mitochondrial 1, ubiquitous (Ckmt1)</b>                                  | <b>3.9</b> |
| <b>Creatine kinase, brain (Ckb)*</b>                                                         | <b>2.6</b> |
| <b>Uncoupling protein 2 (Ucp2)</b>                                                           | <b>2.0</b> |
| <b>Uncoupling protein 3 (Ucp3)</b>                                                           | <b>2.2</b> |
| <hr/>                                                                                        |            |
| <b>Antioxidant activity</b>                                                                  |            |
| <hr/>                                                                                        |            |
| <b>Thioredoxin-like 4B (Txnl4b)</b>                                                          | <b>2.3</b> |
| <b>Thioredoxin domain containing 11, predicted (Txndc11)</b>                                 | <b>3.3</b> |
| <b>Thioredoxin domain containing 12, endoplasmic reticulum (Txndc12)</b>                     | <b>2.0</b> |
| <b>Glutaredoxin 1, thioltransferase (Glrx1)</b>                                              | <b>2.0</b> |
| <b>Glutaredoxin 2, thioltransferase (Glrx2)</b>                                              | <b>2.5</b> |
| <b>Glutathione peroxidase 2 (Gpx2)</b>                                                       | <b>2.1</b> |
| <b>Glutathione peroxidase 7, predicted (Gpx7 predicted)</b>                                  | <b>2.0</b> |
| <b>Peroxiredoxin 3 (Prdx3)</b>                                                               | <b>2.0</b> |

---

**TABLE S2.** Metabolic gene expression array results after Spotfire analysis and organization into classic metabolic pathways. Upregulated genes are fold change (AdBcl3/AdGFP)  $\geq 2.0$ ; downregulated genes are fold change  $\leq 0.5$ ;  $P \leq 0.05$  (n=4. \* represents genes that were also identified as ERR $\alpha$  targets previously via gene expression array or ChIP-on-Chip studies (13, 29).

**TABLE S3. The complete gene expression array results for Bcl3-regulated genes in cardiac myocytes.**

| <b>Fold change</b> | <b>Accession Number</b> | <b>Unigene Gene Name</b>                                                                                           | <b>Unigene Gene Symbol</b> |
|--------------------|-------------------------|--------------------------------------------------------------------------------------------------------------------|----------------------------|
| 49.702             | BF284307                | Vestigial like 2 homolog (Drosophila) (predicted)                                                                  | Vgll2_predicted            |
| 38.844             | AI764437                |                                                                                                                    |                            |
| 18.684             | AW529938                | B-box and SPRY domain containing                                                                                   | Bspry                      |
| 17.049             | AI028874                |                                                                                                                    |                            |
| 16.920             | AF068268                | 2-5 oligoadenylate synthetase 1B                                                                                   | Oas1b                      |
| 16.661             | AA963273                | Transcribed locus                                                                                                  |                            |
| 15.789             | BF405569                | Transcribed locus                                                                                                  |                            |
| 15.148             | AB026903                | Decay accelerating factor 1                                                                                        | Daf1                       |
| 12.236             | NM_012817               | Insulin-like growth factor binding protein 5                                                                       | Igfbp5                     |
| 11.989             | BF386180                | Transcribed locus, strongly similar to XP_346992.2<br>PREDICTED: similar to epididymal protein [Rattus norvegicus] |                            |
| 11.545             | BE106145                | Transcribed locus                                                                                                  |                            |
| 10.865             | AI059468                | Hypothetical protein LOC308990                                                                                     | LOC308990                  |
| 10.680             | NM_012582               | Haptoglobin                                                                                                        | Hp                         |
| 9.391              | AW532890                | Similar to OEF2 (predicted)                                                                                        | RGD1563091_predicted       |
| 9.235              | BE099840                | Similar to Expressed sequence AW547186 (predicted)                                                                 | RGD1563286_predicted       |
| 7.941              | NM_012859               | Lipase, hormone sensitive                                                                                          | Lipe                       |
| 7.702              | NM_031031               | Glycine amidinotransferase (L-arginine:glycine amidinotransferase)                                                 | Gatm                       |
| 7.524              | AI576297                | Programmed cell death 4                                                                                            | Pdcd4                      |
| 7.459              | AI171480                | Transcribed locus                                                                                                  |                            |
| 7.331              | BE106796                | Transcribed locus, weakly similar to NP_778159.1<br>hypothetical protein LOC211039 [Mus musculus]                  |                            |
| 7.111              | BI296482                | Transcribed locus                                                                                                  |                            |
| 7.087              | AI045150                | Transcribed locus, strongly similar to XP_573755.1<br>PREDICTED: similar to                                        |                            |

|       |           |                                                                                                                                           |                   |
|-------|-----------|-------------------------------------------------------------------------------------------------------------------------------------------|-------------------|
|       |           | hypothetical gene supported by AK044523 [Rattus norvegicus]                                                                               |                   |
| 7.047 | BI283883  | Crumbs homolog 3 (Drosophila)                                                                                                             | Crb3              |
| 7.008 | BF557891  | Interferon regulatory factor 6 (predicted)                                                                                                | Irf6_predicted    |
| 7.004 | BF392357  |                                                                                                                                           |                   |
| 6.826 | AF134409  | RASD family, member 2                                                                                                                     | Rasd2             |
| 6.753 | AA998516  | Cyclin A2                                                                                                                                 | Ccna2             |
| 6.570 | BF410603  | Interferon regulatory factor 6 (predicted)                                                                                                | Irf6_predicted    |
| 6.560 | AW253690  | DEP domain containing 1a (predicted)                                                                                                      | Depdc1a_predicted |
| 6.556 | NM_134350 | Myxovirus (influenza virus) resistance 2                                                                                                  | Mx2               |
| 6.424 | AI175045  | Transcribed locus, weakly similar to XP_575132.1<br>PREDICTED: similar to LRRGT00012 [Rattus norvegicus]                                  |                   |
| 6.404 | BI302778  | Transcribed locus, strongly similar to XP_344880.2<br>PREDICTED: similar to Uroplakin Ia (UPIa) (UPKa) [Rattus norvegicus]                |                   |
| 6.396 | NM_012604 | Myosin, heavy polypeptide 3, skeletal muscle, embryonic                                                                                   | Myh3              |
| 6.072 | AW920026  | Similar to RIKEN cDNA 4933417L10                                                                                                          | LOC364393         |
| 6.069 | BI303853  | Transcribed locus, moderately similar to XP_234745.3<br>PREDICTED: similar to Ig heavy chain V-I region HG3 precursor [Rattus norvegicus] |                   |
| 6.022 | BG379319  | Transforming growth factor, beta induced                                                                                                  | Tgfbi             |
| 6.017 | AI176565  | Acyl-CoA synthetase short-chain family member 1 (predicted)                                                                               | Acssl1_predicted  |
| 5.907 | AI764144  | RT1 class Ib, locus Aw2                                                                                                                   | RT1-Aw2           |
| 5.779 | BF282370  | Thymidylate kinase family LPS-inducible member (predicted)                                                                                | Tyki_predicted    |
| 5.608 | AI714002  | Antigen identified by monoclonal antibody Ki-67 (predicted)                                                                               | Mki67_predicted   |



|       |           |                                                                                                                                        |                      |
|-------|-----------|----------------------------------------------------------------------------------------------------------------------------------------|----------------------|
| 5.587 | NM_012949 | Enolase 3, beta                                                                                                                        | Eno3                 |
| 5.539 | BM383329  | Cyclin E2 (predicted)                                                                                                                  | Ccne2_predicted      |
| 5.443 | AW520508  | Transcribed locus, moderately similar to XP_578837.1<br>PREDICTED: similar to Ac1147 [Rattus norvegicus]                               |                      |
| 5.397 | NM_023094 | ABO blood group (transferase A, alpha 1-3-N-acetylgalactosaminyltransferase; transferase B, alpha 1-3-galactosyltransferase)           | Abo                  |
| 5.396 | NM_013174 | Transforming growth factor, beta 3                                                                                                     | Tgfb3                |
| 5.343 | NM_017097 | Cathepsin C                                                                                                                            | Ctsc                 |
| 5.329 | AI407953  | Transcribed locus                                                                                                                      |                      |
| 5.324 | AA818849  | Similar to hypothetical protein FLJ11354 (predicted)                                                                                   | RGD1310093_predicted |
| 5.303 | BF550033  |                                                                                                                                        |                      |
| 5.270 | AI044253  | Transcribed locus, strongly similar to XP_232620.3<br>PREDICTED: similar to transcriptional regulatory protein [Rattus norvegicus]     |                      |
| 5.197 | BI275929  | Coilin                                                                                                                                 | Coil                 |
| 5.193 | AW921174  | Pregnancy-specific beta 1-glycoprotein                                                                                                 | Psgb1                |
| 5.161 | AI137518  | Coxsackie virus and adenovirus receptor                                                                                                | Cxadr                |
| 5.067 | AI410749  | Transcribed locus                                                                                                                      |                      |
| 5.002 | NM_133523 | Matrix metalloproteinase 3                                                                                                             | Mmp3                 |
| 4.969 | AA901350  | Transcribed locus, strongly similar to XP_227762.3<br>PREDICTED: similar to Guanylate nucleotide binding protein 4 [Rattus norvegicus] |                      |
| 4.921 | AW534332  | Transcribed locus                                                                                                                      |                      |
| 4.888 | AI010322  | Muscleblind-like 3 (Drosophila) (predicted)                                                                                            | Mbnl3_predicted      |
| 4.862 | BI284344  | Keratin complex 2, basic, gene 7                                                                                                       | Krt2-7               |
| 4.832 | BI289329  | Similar to RIKEN cDNA 2310042D19                                                                                                       | RGD1304931           |
| 4.794 | BE109109  | Similar to RIKEN cDNA 6530401L14 gene                                                                                                  | RGD1309107           |
| 4.784 | AA799557  |                                                                                                                                        |                      |

|       |           |                                                                    |                      |
|-------|-----------|--------------------------------------------------------------------|----------------------|
| 4.779 | NM_019174 | Carbonic anhydrase 4                                               | Ca4                  |
| 4.745 | AA996882  | Serine/threonine kinase 6                                          | Stk6                 |
| 4.654 | AA851385  |                                                                    |                      |
| 4.608 | BE118697  | Interferon-induced protein with tetratricopeptide repeats 2        | Ifit2                |
| 4.570 | BF282318  | Similar to Serum amyloid A-3 protein precursor                     | LOC691143            |
| 4.545 | AA956417  | Transcribed locus                                                  |                      |
| 4.512 | BF282712  | Similar to Hypothetical protein MGC37938 (predicted)               | RGD1566169_predicted |
| 4.511 | NM_019205 | Chemokine (C-C motif) ligand 11                                    | Ccl11                |
| 4.498 | NM_019335 | Protein kinase, interferon-inducible double stranded RNA dependent | Prkr                 |
| 4.482 | U05341    | Cell division cycle 20 homolog (S. cerevisiae)                     | Cdc20                |
| 4.423 | BE110723  | M-phase phosphoprotein 1 (predicted)                               | Mphosph1_predicted   |
| 4.403 | BF567808  |                                                                    |                      |
| 4.352 | AA818377  | Zinc finger protein 533 (predicted)                                | Zfp533_predicted     |
| 4.341 | AI408440  | Similar to interferon-inducible GTPase                             | MGC108823            |
| 4.301 | BE104060  | Transcribed locus                                                  |                      |
| 4.268 | AW531714  | Ubiquitin-conjugating enzyme E2T (putative) (predicted)            | Ube2t_predicted      |
| 4.242 | AA818262  | Angiopoietin-like 4                                                | Angptl4              |
| 4.233 | BI286411  | Keratin complex 2, basic, gene 5                                   | Krt2-5               |
| 4.216 | AI578135  | Ect2 oncogene (predicted)                                          | Ect2_predicted       |
| 4.197 | BE108276  |                                                                    |                      |
| 4.170 | BI295150  | Cytoskeleton associated protein 2 (predicted)                      | Ckap2_predicted      |
| 4.149 | AI501320  | Transcribed locus                                                  |                      |
| 4.125 | AI411541  | Prostaglandin E receptor 3 (subtype EP3)                           | Ptger3               |
| 4.118 | AA819227  | Tumor necrosis factor (TNF superfamily, member 2)                  | Tnf                  |
| 4.117 | NM_053551 | Pyruvate dehydrogenase kinase, isoenzyme 4                         | Pdk4                 |
| 4.115 | BG666306  | Thrombomodulin                                                     | Thbd                 |
| 4.073 | AI010157  | Similar to hypothetical protein MGC33926                           | MGC94782             |

|       |           |                                                                                                                                                                                           |                      |
|-------|-----------|-------------------------------------------------------------------------------------------------------------------------------------------------------------------------------------------|----------------------|
| 4.054 | BF398114  | Transcribed locus, strongly similar to XP_862455.1<br><b>PREDICTED: similar to Axin 2 (Axis inhibition protein 2) (Conductin) (Axin-like protein) (Axil) isoform 2 [Canis familiaris]</b> |                      |
| 4.039 | BF281994  | Transducin (beta)-like 1X-linked receptor 1 (predicted)                                                                                                                                   | Tbl1xr1_predicted    |
| 4.021 | BF283320  | Transcribed locus                                                                                                                                                                         |                      |
| 4.020 | BE102202  | Transcribed locus                                                                                                                                                                         |                      |
| 4.020 | BF393567  | Similar to vacuolar protein sorting 13C protein (predicted)                                                                                                                               | RGD1560364_predicted |
| 4.003 | BI289546  | Brain expressed X-linked 4                                                                                                                                                                | Bex4                 |
| 4.001 | NM_019348 | Somatostatin receptor 2                                                                                                                                                                   | Sstr2                |
| 3.996 | AI169749  | Transcribed locus, strongly similar to XP_580054.1<br><b>PREDICTED: hypothetical protein XP_580054 [Rattus norvegicus]</b>                                                                |                      |
| 3.980 | AI555284  | Transcribed locus                                                                                                                                                                         |                      |
| 3.948 | NM_031766 | Carboxypeptidase Z                                                                                                                                                                        | Cpz                  |
| 3.925 | BI301453  | Creatine kinase, mitochondrial 1, ubiquitous                                                                                                                                              | Ckmt1                |
| 3.918 | AW524109  | Transcribed locus                                                                                                                                                                         |                      |
| 3.912 | AA957260  | Ribonucleotide reductase M2 (mapped)                                                                                                                                                      | Rrm2_mapped          |
| 3.911 | BI284296  | G protein-coupled receptor 126 (predicted)                                                                                                                                                | Gpr126_predicted     |
| 3.857 | NM_053749 | Aurora kinase B                                                                                                                                                                           | Aurkb                |
| 3.846 | BF411794  | Abhydrolase domain containing 6                                                                                                                                                           | Abhd6                |
| 3.805 | BF410644  | Transcribed locus                                                                                                                                                                         |                      |
| 3.736 | Z18877    | 2',5'-oligoadenylate synthetase 1, 40/46kDa                                                                                                                                               | Oas1                 |
| 3.732 | BF552738  | Similar to DnaJ (Hsp40) homolog, subfamily B, member 10 isoform 2                                                                                                                         | LOC689593            |
| 3.723 | NM_053318 | Hemopexin                                                                                                                                                                                 | Hpx                  |
| 3.710 | NM_021696 | Serine (or cysteine) proteinase inhibitor, clade B, member 2                                                                                                                              | Serpinb2             |
| 3.707 | BG662490  | Abhydrolase domain containing 3 (predicted)                                                                                                                                               | Abhd3_predicted      |
| 3.695 | BF396237  | Nuclear receptor subfamily 4,                                                                                                                                                             | Nr4a3                |

|              |                  |                                                                                                                       |                             |
|--------------|------------------|-----------------------------------------------------------------------------------------------------------------------|-----------------------------|
|              |                  | <b>group A, member 3</b>                                                                                              |                             |
| <b>3.694</b> | <b>AI500951</b>  | <b>Serine (or cysteine) peptidase inhibitor, clade E, member 1</b>                                                    | <b>Serpine1</b>             |
| <b>3.693</b> | <b>NM_017328</b> | <b>Phosphoglycerate mutase 2</b>                                                                                      | <b>Pgam2</b>                |
| <b>3.690</b> | <b>AI408713</b>  | <b>Imprinted and ancient</b>                                                                                          | <b>Impact</b>               |
| <b>3.658</b> | <b>AF253065</b>  | <b>Chemokine-like factor</b>                                                                                          | <b>Ck1f</b>                 |
| <b>3.651</b> | <b>BI303598</b>  | <b>Spindle pole body component 24 homolog (<i>S. cerevisiae</i>) (predicted)</b>                                      | <b>Spbc24_predicted</b>     |
| <b>3.648</b> | <b>BI289692</b>  | <b>Transcribed locus</b>                                                                                              |                             |
| <b>3.646</b> | <b>AI235499</b>  | <b>Transcribed locus</b>                                                                                              |                             |
| <b>3.612</b> | <b>AA799328</b>  | <b>Similar to expressed sequence AW413625 (predicted)</b>                                                             | <b>RGD1560913_predicted</b> |
| <b>3.586</b> | <b>AI137995</b>  | <b>Sodium channel, voltage-gated, type IV, beta</b>                                                                   | <b>Scn4b</b>                |
| <b>3.585</b> | <b>BF415216</b>  | <b>Transcribed locus</b>                                                                                              |                             |
| <b>3.546</b> | <b>BI290662</b>  | <b>Similar to CG3880-PA</b>                                                                                           | <b>LOC680531</b>            |
| <b>3.542</b> | <b>BI296084</b>  | <b>Ubiquitin-conjugating enzyme E2C (predicted)</b>                                                                   | <b>Ube2c_predicted</b>      |
| <b>3.533</b> | <b>X52711</b>    | <b>Myxovirus (influenza virus) resistance 1</b>                                                                       | <b>Mx1</b>                  |
| <b>3.531</b> | <b>BM385105</b>  | <b>Phospholipase C, delta 3 (predicted)</b>                                                                           | <b>Plcd3_predicted</b>      |
| <b>3.512</b> | <b>AA800004</b>  | <b>Septin 4</b>                                                                                                       | <b>4-Sep</b>                |
| <b>3.506</b> | <b>BM386609</b>  | <b>Syndecan binding protein (syntenin) 2</b>                                                                          | <b>Sdcbp2</b>               |
| <b>3.492</b> | <b>BM384841</b>  | <b>RAB15, member RAS oncogene family</b>                                                                              | <b>Rab15</b>                |
| <b>3.468</b> | <b>AW531805</b>  | <b>Interferon-induced protein with tetratricopeptide repeats 3</b>                                                    | <b>Ifit3</b>                |
| <b>3.440</b> | <b>BF399394</b>  |                                                                                                                       |                             |
| <b>3.434</b> | <b>BE109322</b>  | <b>Polo-like kinase 4 (<i>Drosophila</i>) (predicted)</b>                                                             | <b>Plk4_predicted</b>       |
| <b>3.393</b> | <b>AA963004</b>  | <b>Transforming growth factor, beta 2</b>                                                                             | <b>Tgfb2</b>                |
| <b>3.382</b> | <b>BM387419</b>  | <b>Transcribed locus, strongly similar to XP_216941.3 PREDICTED: similar to Matrilin 2 [<i>Rattus norvegicus</i>]</b> |                             |
| <b>3.378</b> | <b>NM_012532</b> | <b>Ceruloplasmin</b>                                                                                                  | <b>Cp</b>                   |
| <b>3.364</b> | <b>BE113148</b>  | <b>Transcribed locus, strongly similar to XP_223397.3 PREDICTED: similar to hypothetical protein [<i>Rattus</i></b>   |                             |

|       |          |                                                                                                                                          |                      |
|-------|----------|------------------------------------------------------------------------------------------------------------------------------------------|----------------------|
|       |          | norvegicus]                                                                                                                              |                      |
| 3.358 | AI045201 | Tumor necrosis factor receptor superfamily, member 21 (predicted)                                                                        | Tnfrsf21_predicted   |
| 3.327 | AI232819 | Thioredoxin domain containing 11 (predicted)                                                                                             | Txndc11_predicted    |
| 3.327 | BF288208 | Transcribed locus                                                                                                                        |                      |
| 3.315 | BE121050 | CDNA clone IMAGE:7318427                                                                                                                 |                      |
| 3.302 | AA964152 | Transcribed locus                                                                                                                        |                      |
| 3.300 | BF386852 | ATP-binding cassette, sub-family A (ABC1), member 8b (predicted)                                                                         | Abca8b_predicted     |
| 3.292 | AI502790 | Similar to mitochondrial carrier family protein                                                                                          | RGD1308774           |
| 3.277 | BE096287 | Transcribed locus, strongly similar to XP_345994.2<br>PREDICTED: similar to cysteine sulfinic acid decarboxylase [Rattus norvegicus]     |                      |
| 3.276 | BF284903 | Transcribed locus                                                                                                                        |                      |
| 3.271 | BF411331 | Serine (or cysteine) proteinase inhibitor, clade B, member 1a                                                                            | Serpinb1a            |
| 3.264 | BG371744 | Similar to zinc finger protein 458                                                                                                       | LOC685865            |
| 3.251 | AA997596 | Similar to CG4502-PA, isoform A                                                                                                          | LOC679949            |
| 3.243 | AW534209 | Transcribed locus                                                                                                                        |                      |
| 3.233 | AI712694 | Similar to hypothetical protein FLJ10156 (predicted)                                                                                     | RGD1308747_predicted |
| 3.220 | AA819788 | Receptor transporter protein 4 (predicted)                                                                                               | Rtp4_predicted       |
| 3.209 | BI285978 | Poly (ADP-ribose) polymerase family, member 12 (predicted)                                                                               | Parp12_predicted     |
| 3.198 | BF388785 | Budding uninhibited by benzimidazoles 1 homolog (S. cerevisiae) (predicted)                                                              | Bub1_predicted       |
| 3.197 | AI227963 | Similar to protein phosphatase 1, regulatory (inhibitory) subunit 1C; thymocyte ARPP; DNA segment, Chr 9, Brigham & Womens Genetics 1012 | RGD1307215           |

|       |           |                                                                                      |                      |
|-------|-----------|--------------------------------------------------------------------------------------|----------------------|
|       |           | expressed                                                                            |                      |
| 3.184 | D14839    | Fibroblast growth factor 9                                                           | Fgf9                 |
| 3.165 | AI716194  | Fibrinogen-like 2*                                                                   | Fgl2*                |
| 3.163 | BE104344  | Similar to RIKEN cDNA G630055P03 gene                                                | RGD1309383           |
| 3.161 | BF417541  | Similar to hypothetical protein FLJ11354 (predicted)                                 | RGD1310093_predicted |
| 3.151 | NM_017187 |                                                                                      |                      |
| 3.151 | AA891826  | Tumor-associated calcium signal transducer 2                                         | Tacstd2              |
| 3.127 | AA819629  | Similar to histocompatibility 28                                                     | LOC310968            |
| 3.118 | AA901035  | Oxysterol binding protein-like 6 (predicted)                                         | Osbpl6_predicted     |
| 3.118 | BF403249  | Similar to RIKEN cDNA 4931400A14 (predicted)                                         | RGD1307234_predicted |
| 3.111 | BG671371  | Similar to ankyrin repeat domain 13c                                                 | LOC685374            |
| 3.108 | BM385936  | Transcribed locus                                                                    |                      |
| 3.106 | NM_133615 | TAF9-like RNA polymerase II, TATA box binding protein (TBP)-associated factor, 31kDa | Taf9l                |
| 3.106 | AA998104  | Transcribed locus                                                                    |                      |
| 3.102 | L15011    | Cortexin                                                                             | Ctxn                 |
| 3.094 | AI227677  | Neural precursor cell expressed, developmentally down-regulated gene 4A              | Nedd4a               |
| 3.075 | BF561454  | Fibrinogen-like 2*                                                                   | Fgl2*                |
| 3.070 | NM_013155 | Very low density lipoprotein receptor*                                               | Vldlr*               |
| 3.053 | AA963085  | Transcribed locus                                                                    |                      |
| 3.038 | BF413643  | Von Willebrand factor A domain containing 1                                          | Vwa1                 |
| 3.038 | BF564273  | Kinetochores associated 1 (predicted)                                                | Kntc1_predicted      |
| 3.037 | AF159103  | Tumor necrosis factor alpha induced protein 6                                        | Tnfai6               |
| 3.026 | AI502703  | Keratin complex 1, acidic, gene 23                                                   | Krt1-23              |
| 3.015 | BI284262  | Protein regulator of cytokinesis 1 (predicted)                                       | Prc1_predicted       |
| 3.014 | NM_013104 | Insulin-like growth factor binding protein 6                                         | Igfbp6               |

|       |           |                                                                                                               |                      |
|-------|-----------|---------------------------------------------------------------------------------------------------------------|----------------------|
| 3.012 | AF361355  | Transmembrane protein 37                                                                                      | Tmem37               |
| 3.007 | NM_013200 | Carnitine palmitoyltransferase 1b, muscle                                                                     | Cpt1b                |
| 3.002 | AA874827  | Discs, large homolog 7 (Drosophila) (predicted)                                                               | Dlg7_predicted       |
| 2.981 | BG665934  | O-acyltransferase (membrane bound) domain containing 2                                                        | Oact2                |
| 2.967 | AA996870  | Chemokine-like receptor 1                                                                                     | Cmklr1               |
| 2.953 | AB032828  | Erythrocyte protein band 4.1-like 3                                                                           | Epb4.113             |
| 2.941 | NM_017029 | Neurofilament 3, medium                                                                                       | Nef3                 |
| 2.937 | NM_032616 | Lipolysis stimulated lipoprotein receptor                                                                     | Lsr                  |
| 2.929 | BM388891  | Interferon-induced protein 35                                                                                 | Ifi35                |
| 2.923 | BG666368  | Signal transducer and activator of transcription 2                                                            | Stat2                |
| 2.920 | AW914913  | Similar to CG4502-PA, isoform A                                                                               | LOC679949            |
| 2.919 | BG672426  | Transcribed locus                                                                                             |                      |
| 2.918 | NM_031315 | Cytosolic acyl-CoA thioesterase 1                                                                             | Ctel                 |
| 2.915 | AA945915  | Transcribed locus, strongly similar to XP_573295.1<br>PREDICTED: similar to deltex 3-like [Rattus norvegicus] |                      |
| 2.915 | BF394545  | Transcribed locus                                                                                             |                      |
| 2.914 | NM_053779 | Serine (or cysteine) peptidase inhibitor, clade I, member 1                                                   | Serpini1             |
| 2.912 | NM_053819 | Tissue inhibitor of metallopeptidase 1                                                                        | Timp1                |
| 2.900 | BM387260  | Transcribed locus                                                                                             |                      |
| 2.898 | NM_022008 | FXD domain-containing ion transport regulator 7                                                               | Fxd7                 |
| 2.883 | AA946413  | Transcribed locus                                                                                             |                      |
| 2.883 | AW916067  | Transcribed locus                                                                                             |                      |
| 2.876 | BF397823  | Transcribed locus                                                                                             |                      |
| 2.873 | BF546570  | Similar to cDNA sequence BC003331 (predicted)                                                                 | RGD1307830_predicted |
| 2.871 | AW526714  | Transcribed locus                                                                                             |                      |
| 2.841 | BG378463  | RGD1563547 (predicted)                                                                                        | RGD1563547_predicted |
| 2.838 | AW525366  | Interferon gamma induced GTPase                                                                               | Igtp                 |
| 2.836 | NM_134472 |                                                                                                               |                      |

|       |           |                                                                                                                     |                      |
|-------|-----------|---------------------------------------------------------------------------------------------------------------------|----------------------|
| 2.832 | NM_024388 | Nuclear receptor subfamily 4, group A, member 1                                                                     | Nr4a1                |
| 2.825 | BM388478  | TRAF4 associated factor 1                                                                                           | Traf4af1             |
| 2.825 | BI296734  | Transporter 1, ATP-binding cassette, sub-family B (MDR/TAP)                                                         | Tap1                 |
| 2.821 | BE120572  | Zinc finger protein 612 (predicted)                                                                                 | Zfp612_predicted     |
| 2.812 | AW533234  | Similar to cardiomyopathy associated 5                                                                              | LOC688915            |
| 2.803 | AA997590  | Osteoglycin (predicted)                                                                                             | Ogn_predicted        |
| 2.801 | M60616    | Matrix metalloproteinase 13                                                                                         | Mmp13                |
| 2.797 | NM_012488 | Alpha-2-macroglobulin                                                                                               | A2m                  |
| 2.792 | BI275815  | Transcribed locus, strongly similar to XP_580230.1<br>PREDICTED: hypothetical protein XP_580230 [Rattus norvegicus] |                      |
| 2.791 | AA926180  | Similar to angiopoietin-like 1                                                                                      | LOC679942            |
| 2.790 | BI296089  | Similar to very large G-protein coupled receptor 1 (predicted)                                                      | RGD1562101_predicted |
| 2.770 | AW532159  | UDP-GlcNAc:betaGal beta-1,3-N-acetylglucosaminyltransferase-like 1                                                  | B3gnt11              |
| 2.770 | AI175488  | Oxysterol binding protein (predicted)                                                                               | Osbp_predicted       |
| 2.767 | NM_021596 | Diazepam binding inhibitor-like 5                                                                                   | Dbil5                |
| 2.759 | AI409634  | Best5 protein                                                                                                       | Best5                |
| 2.737 | NM_053477 | Malonyl-CoA decarboxylase                                                                                           | Mlycd                |
| 2.730 | BF552877  | Solute carrier family 24, member 5 (predicted)                                                                      | Slc24a5_predicted    |
| 2.729 | BG671264  | ATP-binding cassette, sub-family A (ABC1), member 8a (predicted)                                                    | Abca8a_predicted     |
| 2.724 | BI295947  | Similar to leiomodulin 3 (fetal) (predicted)                                                                        | RGD1564924_predicted |
| 2.721 | BF404433  | Ankyrin repeat domain 52 (predicted)                                                                                | Ankrd52_predicted    |
| 2.713 | BI292425  | Complement component 1, r subcomponent                                                                              | C1r                  |
| 2.705 | BF284360  | Transcribed locus                                                                                                   |                      |
| 2.702 | AI639237  | THO complex 2 (predicted)                                                                                           | Thoc2_predicted      |



|       |           |                                                                                                                  |                   |
|-------|-----------|------------------------------------------------------------------------------------------------------------------|-------------------|
| 2.701 | AI502837  | Integrin beta 8 (predicted)                                                                                      | Itgb8_predicted   |
| 2.691 | AA799431  | Similar to leucine rich repeat containing 39 isoform 2                                                           | LOC691307         |
| 2.690 | AF322216  | Immunoglobulin superfamily, member 1                                                                             | Igsf1             |
| 2.679 | BE111697  | Kinesin family member 20A (predicted)                                                                            | Kif20a_predicted  |
| 2.666 | BE095824  | Chemokine (C-C motif) ligand 6                                                                                   | Ccl6              |
| 2.662 | BE108569  | Guanylate nucleotide binding protein 4 (predicted)                                                               | Gbp4_predicted    |
| 2.661 | BF417638  | Cell division cycle associated 3                                                                                 | Cdca3             |
| 2.658 | AI764605  | Transcribed locus                                                                                                |                   |
| 2.655 | AI599350  | Proteasome (prosome, macropain) subunit, beta type 9                                                             | Psmb9             |
| 2.644 | AA943147  | Potential ubiquitin ligase                                                                                       | Herc6             |
| 2.643 | NM_031589 | Solute carrier family 37 (glycerol-6-phosphate transporter), member 4                                            | Slc37a4           |
| 2.639 | NM_133624 | Guanylate nucleotide binding protein 2                                                                           | Gbp2              |
| 2.635 | NM_012976 | Lectin, galactose binding, soluble 5                                                                             | Lgals5            |
| 2.633 | U36771    | Glycerol-3-phosphate acyltransferase, mitochondrial                                                              | Gpam              |
| 2.632 | AI409259  | Rac GTPase-activating protein 1 (predicted)                                                                      | Racgap1_predicted |
| 2.628 | BI279216  | Ubiquitin-conjugating enzyme E2L 6                                                                               | Ube2l6            |
| 2.627 | BM385445  | Topoisomerase (DNA) 2 alpha                                                                                      | Top2a             |
| 2.626 | BF556985  | Wingless-related MMTV integration site 2                                                                         | Wnt2              |
| 2.626 | NM_022391 | Pituitary tumor-transforming 1                                                                                   | Pttg1             |
| 2.621 | AI717736  | Hypothetical protein LOC503164                                                                                   | LOC503164         |
| 2.619 | L27487    | Calcitonin receptor-like                                                                                         | Calcr1            |
| 2.606 | AI145035  | Transcribed locus                                                                                                |                   |
| 2.601 | NM_017102 | Solute carrier family 2 (facilitated glucose transporter), member 3                                              | Slc2a3            |
| 2.600 | AA964219  | Transcribed locus, strongly similar to XP_225720.3 PREDICTED: similar to Lipase, endothelial [Rattus norvegicus] |                   |
| 2.597 | NM_012548 | Endothelin 1                                                                                                     | Edn1              |

|       |           |                                                 |                      |
|-------|-----------|-------------------------------------------------|----------------------|
| 2.590 | BM389254  | Annexin A8                                      | Anxa8                |
| 2.590 | BF281980  | Transcribed locus                               |                      |
| 2.587 | M14400    | Creatine kinase, brain*                         | Ckb*                 |
| 2.586 | BM385476  | Bone marrow stromal cell antigen 2              | Bst2                 |
| 2.586 | AI172141  | Ankyrin 1, erythroid                            | Ank1                 |
| 2.583 | AA945178  | Transferrin                                     | Tf                   |
| 2.578 | AI102560  | Rap guanine nucleotide exchange factor (GEF) 5  | Rapgef5              |
| 2.576 | AI555044  | Hypothetical RNA binding protein RGD1359713     | RGD1359713           |
| 2.550 | NM_024483 | Adrenergic receptor, alpha 1d                   | Adra1d               |
| 2.545 | AI234119  | Transcribed locus                               |                      |
| 2.531 | BF555448  | Mitochondrial acyl-CoA thioesterase 1           | Mte1                 |
| 2.520 | BF558518  | Glutaredoxin 2 (thioltransferase)               | Glr2                 |
| 2.514 | L09752    | Cyclin D2                                       | Ccnd2                |
| 2.504 | BG381524  | Cell division cycle associated 2                | Cdca2                |
| 2.502 | BF414118  | Transcribed locus                               |                      |
| 2.501 | NM_013151 | Plasminogen activator, tissue                   | Plat                 |
| 2.500 | NM_019211 | RAS guanyl releasing protein 1                  | Rasgrp1              |
| 2.488 | BE120953  | Ligand of numb-protein X 1 (predicted)          | Lnx1_predicted       |
| 2.486 | BG663483  | Protocadherin alpha 4                           | Pcdha4               |
| 2.484 | BE098538  | Transcribed locus                               |                      |
| 2.481 | AI639142  | Similar to RAD51 associated protein 1           | LOC689055            |
| 2.478 | M25804    | Nuclear receptor subfamily 1, group D, member 1 | Nr1d1                |
| 2.475 | BF406973  | Similar to DKFZP434P1750 protein (predicted)    | RGD1311490_predicted |
| 2.467 | BI291434  | Phosphofructokinase, muscle                     | Pfkm                 |
| 2.467 | X57764    | Endothelin receptor type B                      | Ednrb                |
| 2.466 | BE108648  | Transcribed locus                               |                      |
| 2.466 | BG663837  | PDZ binding kinase (predicted)                  | Pbk_predicted        |
| 2.463 | BE117126  | Similar to RIKEN cDNA 2310005N03 gene           | RGD1309105_predicted |
| 2.456 | BF561546  | Transcribed locus                               |                      |
| 2.455 | AA944898  | Amino adipate-semialdehyde synthase (predicted) | Aass_predicted       |
| 2.452 | NM_031855 | Ketohexokinase                                  | Khk                  |

|       |           |                                                                                                                                             |                      |
|-------|-----------|---------------------------------------------------------------------------------------------------------------------------------------------|----------------------|
| 2.451 | AA901341  | Transcribed locus                                                                                                                           |                      |
| 2.445 | BG379338  | Transcribed locus, strongly similar to NP_033130.1 ribonucleotide reductase M2 [Mus musculus]                                               |                      |
| 2.444 | AI502114  | ATP-binding cassette, sub-family A (ABC1), member 1                                                                                         | Abca1                |
| 2.444 | AW534220  | Oxysterol binding protein-like 1A                                                                                                           | Osbpl1a              |
| 2.444 | NM_017020 | Interleukin 6 receptor, alpha                                                                                                               | Il6ra                |
| 2.443 | AI145247  | Transcribed locus                                                                                                                           |                      |
| 2.442 | NM_017332 | Fatty acid synthase                                                                                                                         | Fasn                 |
| 2.441 | BM986214  | 6-phosphofructo-2-kinase/fructose-2,6-biphosphatase 2                                                                                       | Pfkfb2               |
| 2.441 | BI280278  | Similar to hypothetical protein DKFZp434A1319 (predicted)                                                                                   | RGD1307357_predicted |
| 2.437 | AI711233  | Transcribed locus                                                                                                                           |                      |
| 2.434 | AI556917  | Transforming, acidic coiled-coil containing protein 3                                                                                       | Tacc3                |
| 2.433 | NM_017256 | Transforming growth factor, beta receptor III                                                                                               | Tgfb3                |
| 2.424 | AW524858  | Transcribed locus                                                                                                                           |                      |
| 2.418 | AI385371  | Extra spindle poles like 1 (S. cerevisiae) (predicted)                                                                                      | Esp11_predicted      |
| 2.410 | D83598    | ATP-binding cassette, sub-family C (CFTR/MRP), member 9                                                                                     | Abcc9                |
| 2.409 | BF559673  | Tumor necrosis factor receptor superfamily, member 17 (predicted)                                                                           | Tnfrsf17_predicted   |
| 2.407 | BM386847  | N-myc (and STAT) interactor                                                                                                                 | Nmi                  |
| 2.398 | NM_031633 | Forkhead box M1                                                                                                                             | Foxm1                |
| 2.398 | NM_053552 | Tumor necrosis factor (ligand) superfamily, member 4                                                                                        | Tnfsf4               |
| 2.395 | NM_016986 | Acetyl-Coenzyme A dehydrogenase, medium chain*                                                                                              | Acadm*               |
| 2.395 | AI716196  | Transcribed locus, strongly similar to XP_577026.1 PREDICTED: similar to transcription elongation factor A (SII)-like 3 [Rattus norvegicus] |                      |
| 2.395 | BF283340  | Transcribed locus                                                                                                                           |                      |

|       |           |                                                                                                                                |                      |
|-------|-----------|--------------------------------------------------------------------------------------------------------------------------------|----------------------|
| 2.390 | BE102400  | Similar to talin 2 (predicted)                                                                                                 | RGD1565416_predicted |
| 2.376 | NM_024162 | Fatty acid binding protein 3*                                                                                                  | Fabp3*               |
| 2.374 | L11995    | Cyclin B1                                                                                                                      | Ccnb1                |
| 2.372 | BI295179  | Transcribed locus, strongly similar to NP_036039.1 ubiquitin specific protease 18 [Mus musculus]                               |                      |
| 2.366 | NM_017066 | Pleiotrophin                                                                                                                   | Ptn                  |
| 2.360 | AW524463  | Similar to RIKEN cDNA 5730410E15 gene (predicted)                                                                              | RGD1564335_predicted |
| 2.359 | AW142969  | Transcribed locus                                                                                                              |                      |
| 2.353 | AI716512  | Solute carrier family 4, sodium bicarbonate transporter-like, member 10                                                        | Slc4a10              |
| 2.345 | NM_012608 | Membrane metallo endopeptidase                                                                                                 | Mme                  |
| 2.344 | AA851904  | 1-acylglycerol-3-phosphate O-acyltransferase 6 (lysophosphatidic acid acyltransferase, zeta)                                   | Agpat6               |
| 2.342 | BF414751  | Similar to Hypothetical protein LOC270802 (predicted)                                                                          | RGD1565498_predicted |
| 2.341 | BI291396  | Similar to Traf2 and NCK interacting kinase, splice variant 4 (predicted)                                                      | RGD1561817_predicted |
| 2.338 | NM_019223 | NADH dehydrogenase (ubiquinone) Fe-S protein 6                                                                                 | Ndufs6               |
| 2.336 | BI279044  | Myosin, light polypeptide 9, regulatory (predicted)                                                                            | My19_predicted       |
| 2.328 | AI102021  | Similar to THO complex subunit 4 (Tho4) (RNA and export factor binding protein 1) (REF1-I) (Ally of AML-1 and LEF-1) (Aly/REF) | LOC690585            |
| 2.327 | BI289045  | Guanine nucleotide binding protein, alpha 14                                                                                   | Gna14                |
| 2.324 | BE112921  | Similar to chromosome 14 open reading frame 145                                                                                | LOC500700            |
| 2.323 | NM_130752 | Fibroblast growth factor 21                                                                                                    | Fgf21                |
| 2.319 | AW522872  | Transcribed locus, weakly similar to NP_766020.1 RIKEN cDNA C030002O17 [Mus musculus]                                          |                      |
| 2.319 | BI281307  | NADH dehydrogenase (ubiquinone) 1 beta subcomplex,                                                                             | Ndufb5_predicted*    |

|              |                  |                                                                                                         |                             |
|--------------|------------------|---------------------------------------------------------------------------------------------------------|-----------------------------|
|              |                  | <b>5 (predicted)*</b>                                                                                   |                             |
| <b>2.318</b> | <b>AA800742</b>  | <b>Similar to Protein C20orf129 homolog (predicted)</b>                                                 | <b>RGD1565583_predicted</b> |
| <b>2.317</b> | <b>BF285089</b>  | <b>Thioredoxin-like 4B</b>                                                                              | <b>Txnl4b</b>               |
| <b>2.311</b> | <b>AI713319</b>  | <b>E2F transcription factor 1</b>                                                                       | <b>E2f1</b>                 |
| <b>2.305</b> | <b>X55812</b>    | <b>Cannabinoid receptor 1 (brain)</b>                                                                   | <b>Cnr1</b>                 |
| <b>2.300</b> | <b>NM_053442</b> | <b>Solute carrier family 7 (cationic amino acid transporter, y+ system), member 8</b>                   | <b>Slc7a8</b>               |
| <b>2.297</b> | <b>AI029057</b>  | <b>Phytanoyl-CoA hydroxylase</b>                                                                        | <b>Phyh</b>                 |
| <b>2.293</b> | <b>AA875348</b>  | <b>Similar to RIKEN cDNA 1110001A07 gene</b>                                                            | <b>RGD1307084</b>           |
| <b>2.292</b> | <b>BE109095</b>  | <b>Similar to Serine/threonine-protein kinase WNK3 (Protein kinase, lysine-deficient 3) (predicted)</b> | <b>RGD1563131_predicted</b> |
| <b>2.284</b> | <b>AJ010392</b>  | <b>Vacuolar protein sorting 54 (yeast)</b>                                                              | <b>Vps54</b>                |
| <b>2.282</b> | <b>AA955871</b>  | <b>Insulin-like growth factor 1</b>                                                                     | <b>Igf1</b>                 |
| <b>2.261</b> | <b>NM_017139</b> | <b>Preproenkephalin, related sequence</b>                                                               | <b>Penk-rs</b>              |
| <b>2.259</b> | <b>BM388202</b>  |                                                                                                         |                             |
| <b>2.258</b> | <b>AI145457</b>  | <b>ELAV (embryonic lethal, abnormal vision, Drosophila)-like 2 (Hu antigen B)</b>                       | <b>Elavl2</b>               |
| <b>2.257</b> | <b>NM_052809</b> | <b>Cysteine dioxygenase 1, cytosolic</b>                                                                | <b>Cdo1</b>                 |
| <b>2.256</b> | <b>BE108158</b>  | <b>Transcribed locus</b>                                                                                |                             |
| <b>2.248</b> | <b>BG371889</b>  |                                                                                                         |                             |
| <b>2.247</b> | <b>BE111727</b>  | <b>Longevity assurance homolog 4 (S. cerevisiae) (predicted)</b>                                        | <b>Lass4_predicted</b>      |
| <b>2.242</b> | <b>AI179119</b>  | <b>Pyruvate dehydrogenase kinase, isoenzyme 3 (mapped)</b>                                              | <b>Pdk3</b>                 |
| <b>2.236</b> | <b>AI102401</b>  | <b>Transcribed locus</b>                                                                                |                             |
| <b>2.235</b> | <b>NM_019157</b> | <b>Aquaporin 7</b>                                                                                      | <b>Aqp7</b>                 |
| <b>2.230</b> | <b>BI277879</b>  | <b>Solute carrier family 30 (zinc transporter), member 2</b>                                            | <b>Slc30a2</b>              |
| <b>2.220</b> | <b>U88294</b>    | <b>Carnitine palmitoyltransferase 1a, liver</b>                                                         | <b>Cpt1a</b>                |
| <b>2.220</b> | <b>AW527492</b>  | <b>Metal response element binding transcription factor 2</b>                                            | <b>Mtf2</b>                 |
| <b>2.219</b> | <b>AI169829</b>  | <b>Mannan-binding lectin serine peptidase 1</b>                                                         | <b>Masp1</b>                |
| <b>2.215</b> | <b>AW253821</b>  | <b>Cyclin B2</b>                                                                                        | <b>Ccnb2</b>                |

|       |           |                                                                                                               |                      |
|-------|-----------|---------------------------------------------------------------------------------------------------------------|----------------------|
| 2.215 | BF398599  | Transcribed locus, strongly similar to XP_577455.1<br>PREDICTED: similar to Diap3 protein [Rattus norvegicus] |                      |
| 2.214 | BE096453  | Ubiquitin-activating enzyme E1-like (predicted)                                                               | Ube1l_predicted      |
| 2.210 | AI575264  | DEAD (Asp-Glu-Ala-Asp) box polypeptide 58 (predicted)                                                         | Ddx58_predicted      |
| 2.206 | BI296885  | PHD finger protein 17 (predicted)                                                                             | Phf17_predicted      |
| 2.205 | U22520    | Chemokine (C-X-C motif) ligand 10                                                                             | Cxcl10               |
| 2.203 | AI717543  | Similar to leucine rich repeat containing 39 isoform 2                                                        | LOC691307            |
| 2.203 | BF283256  | Sodium channel associated protein 1                                                                           | Sap1                 |
| 2.202 | NM_053908 | Protein tyrosine phosphatase, non-receptor type 6                                                             | Ptpn6                |
| 2.201 | NM_057103 | A kinase (PRKA) anchor protein (gravin) 12                                                                    | Akap12               |
| 2.201 | AI230669  | Guanine nucleotide binding protein, beta 1                                                                    | Gnb1                 |
| 2.200 | BF419319  | 2'-5' oligoadenylate synthetase-like 1                                                                        | Oasl1                |
| 2.200 | NM_057197 | 2,4-dienoyl CoA reductase 1, mitochondrial                                                                    | Decr1                |
| 2.199 | AA850751  |                                                                                                               |                      |
| 2.198 | AW920352  | Transcribed locus                                                                                             |                      |
| 2.197 | NM_031530 | Chemokine (C-C motif) ligand 2                                                                                | Ccl2                 |
| 2.195 | NM_024355 | Axin2                                                                                                         | Axin2                |
| 2.191 | BI290037  | Junction adhesion molecule 2                                                                                  | Jam2                 |
| 2.188 | AI059150  | Integrin alpha 8                                                                                              | Itga8                |
| 2.186 | NM_013026 | Syndecan 1                                                                                                    | Sdc1                 |
| 2.185 | H33148    | Similar to mKIAA0256 protein (predicted)                                                                      | RGD1559930_predicted |
| 2.176 | BE118450  | Retinoid X receptor gamma                                                                                     | Rxrg                 |
| 2.173 | AI411941  | Fibronectin type III domain containing 1                                                                      | Fndc1                |
| 2.173 | BF411036  | Interferon regulatory factor 7                                                                                | Irf7                 |
| 2.171 | U92069    | Uncoupling protein 3 (mitochondrial, proton carrier)                                                          | Ucp3                 |
| 2.169 | NM_019333 | 6-phosphofructo-2-kinase/fructose-2,6-biphosphatase 4                                                         | Pfkfb4               |

|       |           |                                                                                                            |                      |
|-------|-----------|------------------------------------------------------------------------------------------------------------|----------------------|
| 2.168 | J02585    | Stearoyl-Coenzyme A desaturase 1                                                                           | Scd1                 |
| 2.167 | BI395810  | Neuropeptide Y receptor Y1                                                                                 | Npy1r                |
| 2.166 | AI600031  | Transcribed locus, strongly similar to NP_573483.1 serum/glucocorticoid regulated kinase 3 [Mus musculus]  |                      |
| 2.164 | AI175539  | Parvalbumin                                                                                                | Pvalb                |
| 2.164 | AI598581  | Neurturin                                                                                                  | Nrtn                 |
| 2.160 | BI290077  | Transcribed locus                                                                                          |                      |
| 2.157 | BI292045  | Similar to SH3 binding domain protein 5 like                                                               | LOC690898            |
| 2.157 | AI317842  | Kinesin family member 22                                                                                   | Kif22                |
| 2.155 | BG673439  | Claudin 11                                                                                                 | Cldn11               |
| 2.151 | AI179403  | Activating signal cointegrator 1 complex subunit 3 (predicted)                                             | Ascc3_predicted      |
| 2.148 | BF290862  | Transcribed locus, strongly similar to NP_666196.1 expressed sequence AW060714 [Mus musculus]              |                      |
| 2.146 | NM_080767 | RT1 class II, locus Bb                                                                                     | RT1-Bb               |
| 2.144 | AW434380  | Similar to leucine rich repeat containing 27 (predicted)                                                   | RGD1559981_predicted |
| 2.141 | NM_057125 | Peroxisomal biogenesis factor 6                                                                            | Pex6                 |
| 2.141 | AI230014  | Phosphoglycerate mutase family member 5                                                                    | Pgam5                |
| 2.139 | AA945761  | Similar to 9230105E10Rik protein                                                                           | RGD1304579           |
| 2.138 | BI277463  | Diacylglycerol O-acyltransferase homolog 2 (mouse)                                                         | Dgat2                |
| 2.137 | BI274399  | Lysyl oxidase-like 3 (predicted)                                                                           | Loxl3_predicted      |
| 2.133 | BG672767  | TBC1 domain family, member 19 (predicted)                                                                  | Tbc1d19_predicted    |
| 2.133 | BF408421  | Peroxisomal biogenesis factor 11c (predicted)                                                              | Pex11c_predicted     |
| 2.133 | BI290897  | Similar to chromosome 2 open reading frame 3; transcription factor 9 (binds GC-rich sequences) (predicted) | RGD1304792_predicted |
| 2.133 | BI288855  | Transcribed locus                                                                                          |                      |
| 2.132 | AI045970  | Transcribed locus, strongly similar to XP_341931.1 PREDICTED: similar to hypothetical protein              |                      |

|              |                  |                                                                                               |                             |
|--------------|------------------|-----------------------------------------------------------------------------------------------|-----------------------------|
|              |                  | <b>B130036O03 [Rattus norvegicus]</b>                                                         |                             |
| <b>2.120</b> | <b>AW142608</b>  | <b>Transcribed locus</b>                                                                      |                             |
| <b>2.120</b> | <b>BI296531</b>  | <b>Mitochondrial ATP synthase regulatory component factor B</b>                               | <b>Atp5s</b>                |
| <b>2.118</b> | <b>AF303035</b>  | <b>Antisense RNA overlapping MCH protein</b>                                                  |                             |
| <b>2.115</b> | <b>BI277042</b>  | <b>Glycerol-3-phosphate dehydrogenase 1 (soluble)</b>                                         | <b>Gpd1</b>                 |
| <b>2.113</b> | <b>NM_022607</b> | <b>NADH dehydrogenase (ubiquinone) flavoprotein 3-like</b>                                    | <b>Ndufv3l</b>              |
| <b>2.112</b> | <b>BF282933</b>  | <b>Acyl-CoA thioesterase 8</b>                                                                | <b>Acot8</b>                |
| <b>2.111</b> | <b>BI279838</b>  | <b>NADH dehydrogenase (ubiquinone) 1 alpha subcomplex, 2 (predicted)</b>                      | <b>Ndufa2_predicted</b>     |
| <b>2.107</b> | <b>AI575616</b>  | <b>Transcribed locus</b>                                                                      |                             |
| <b>2.105</b> | <b>AF104399</b>  | <b>Cbp/p300-interacting transactivator with Glu/Asp-rich carboxy-terminal domain 1</b>        | <b>Cited1</b>               |
| <b>2.094</b> | <b>NM_057107</b> | <b>Acyl-CoA synthetase long-chain family member 3</b>                                         | <b>Acsl3</b>                |
| <b>2.089</b> | <b>BF549923</b>  | <b>Proprotein convertase subtilisin/kexin type 5</b>                                          | <b>Pcsk5</b>                |
| <b>2.081</b> | <b>NM_053681</b> | <b>S100 calcium binding protein A3</b>                                                        | <b>S100a3</b>               |
| <b>2.079</b> | <b>AW533321</b>  | <b>Fatty acid desaturase 3</b>                                                                | <b>Fads3</b>                |
| <b>2.068</b> | <b>D88891</b>    | <b>Acyl-CoA thioesterase 7</b>                                                                | <b>Acot7</b>                |
| <b>2.058</b> | <b>M22756</b>    | <b>NADH dehydrogenase (ubiquinone) flavoprotein 2</b>                                         | <b>Ndufv2</b>               |
| <b>2.058</b> | <b>AI029749</b>  | <b>Short coiled-coil protein</b>                                                              | <b>Scoc</b>                 |
| <b>2.057</b> | <b>AI177761</b>  | <b>CD68 antigen</b>                                                                           | <b>Cd68</b>                 |
| <b>2.054</b> | <b>AW532165</b>  | <b>Sema domain, immunoglobulin domain (Ig), short basic domain, secreted, (semaphorin) 3D</b> | <b>Sema3d</b>               |
| <b>2.050</b> | <b>BE120904</b>  | <b>Transcribed locus</b>                                                                      |                             |
| <b>2.049</b> | <b>AA964902</b>  | <b>Similar to CG1998-PA</b>                                                                   | <b>LOC691221</b>            |
| <b>2.046</b> | <b>BF284106</b>  | <b>Similar to hypothetical protein MGC29390 (predicted)</b>                                   | <b>RGD1310490_predicted</b> |
| <b>2.043</b> | <b>BG377082</b>  | <b>TRAF-interacting protein (predicted)</b>                                                   | <b>Traip_predicted</b>      |
| <b>2.041</b> | <b>NM_133406</b> | <b>1-acylglycerol-3-phosphate O-acyltransferase 4 (lysophosphatidic acid</b>                  | <b>Agpat4</b>               |



|       |           |                                                                                                                      |                      |
|-------|-----------|----------------------------------------------------------------------------------------------------------------------|----------------------|
|       |           | acyltransferase, delta)                                                                                              |                      |
| 2.039 | NM_131902 | Cyclin-dependent kinase inhibitor 2C (p18, inhibits CDK4)                                                            | Cdkn2c               |
| 2.039 | AW252811  | Similar to Moloney leukemia virus 10                                                                                 | LOC310756            |
| 2.037 | BF546148  | LOC363015 (predicted)                                                                                                | RGD1310444_predicted |
| 2.036 | BI301008  | CDNA clone IMAGE:7317308                                                                                             |                      |
| 2.036 | AA925583  | B-cell linker                                                                                                        | Blnk                 |
| 2.036 | NM_031564 | Eph receptor A3                                                                                                      | Epha3                |
| 2.034 | NM_022278 | Glutaredoxin 1 (thioltransferase)                                                                                    | Glr1                 |
| 2.033 | BF416400  | Similar to glycosyltransferase 8 domain containing 2 (predicted)                                                     | RGD1560432_predicted |
| 2.031 | BF282631  | Complement component 7                                                                                               | C7                   |
| 2.031 | BG381587  | Beta-site APP-cleaving enzyme 2                                                                                      | Bace2                |
| 2.028 | AI113308  | Transcribed locus                                                                                                    |                      |
| 2.027 | BE100009  | Transcribed locus, strongly similar to XP_232942.3<br>PREDICTED: similar to hypothetical protein [Rattus norvegicus] |                      |
| 2.027 | AA875647  | Transcribed locus                                                                                                    |                      |
| 2.027 | AI236188  | Transcribed locus                                                                                                    |                      |
| 2.026 | BG668816  | Ethanolamine kinase 1 (predicted)                                                                                    | Etnk1_predicted      |
| 2.025 | AI013730  | Similar to hypothetical protein (predicted)                                                                          | RGD1305269_predicted |
| 2.025 | NM_012955 | FSH primary response 1                                                                                               | Fshprh1              |
| 2.024 | BM384521  | Similar to putative N-acetyltransferase Camello 2 (predicted)                                                        | RGD1305719_predicted |
| 2.024 | BM392002  | Coenzyme A synthase                                                                                                  | Coasy                |
| 2.023 | BF387780  |                                                                                                                      |                      |
| 2.021 | BE107760  | Stearoyl-Coenzyme A desaturase 2*                                                                                    | Scd2*                |
| 2.021 | AA859496  | GTP cyclohydrolase 1                                                                                                 | Gch                  |
| 2.017 | BM389001  | Procollagen, type IX, alpha 3 (predicted)                                                                            | Col9a3_predicted     |
| 2.017 | AA875107  | Similar to NADH-ubiquinone oxidoreductase B9 subunit (Complex I-B9) (CI-B9)                                          | LOC691001            |

|       |           |                                                                                       |                      |
|-------|-----------|---------------------------------------------------------------------------------------|----------------------|
| 2.017 | AI012418  | Sterol O-acyltransferase 1                                                            | Soat1                |
| 2.017 | BF393945  | Transcribed locus                                                                     |                      |
| 2.017 | AI011772  | Peroxiredoxin 3                                                                       | Prdx3                |
| 2.017 | BI303342  | Adipocyte-specific adhesion molecule                                                  | Asam                 |
| 2.016 | NM_019296 | Cell division cycle 2 homolog A (S. pombe)                                            | Cdc2a                |
| 2.015 | AI071166  | Similar to 1110007F12Rik protein                                                      | MGC109491            |
| 2.015 | BM389302  | Nidogen 2                                                                             | Nid2                 |
| 2.012 | NM_012589 | Interleukin 6                                                                         | Il6                  |
| 2.011 | NM_053921 | Peroxisomal biogenesis factor 12                                                      | Pex12                |
| 2.011 | BG671549  | Superoxide dismutase 2, mitochondrial                                                 | Sod2                 |
| 2.011 | AF399874  | Troponin T1, skeletal, slow                                                           | Tnnt1                |
| 2.010 | AA957288  | Acyl-CoA synthetase long-chain family member 1                                        | Acsl1                |
| 2.009 | NM_053482 | Sperm autoantigenic protein 17                                                        | Spa17                |
| 2.008 | BG377729  | Similar to thrombospondin, type I, domain containing 2 (predicted)                    | RGD1563246_predicted |
| 2.008 | AI170333  | Low density lipoprotein receptor-related protein associated protein 1                 | Lrpap1               |
| 2.007 | BI284800  | Guanine nucleotide binding protein beta 4 subunit                                     | Gnb4                 |
| 2.007 | NM_133514 | Matrix metalloproteinase 10                                                           | Mmp10                |
| 2.005 | AI177957  | SP110 nuclear body protein                                                            | Sp110                |
| 2.002 | BF543355  | Immunoglobulin superfamily, member 10                                                 | Igsf10               |
| 2.001 | AF058787  | Similar to Heme oxygenase 3 (HO-3)                                                    | LOC365909            |
| 2.001 | AI102641  | Ubiquitin carboxyl-terminal hydrolase L5                                              | Uchl5                |
| 1.999 | AI706508  | Peroxisome proliferative activated receptor, gamma, coactivator-related 1 (predicted) | Pprc1_predicted      |
| 1.997 | AI101330  | Neurocalcin delta                                                                     | Ncald                |
| 1.997 | BI303342  | Adipocyte-specific adhesion molecule                                                  | Asam                 |
| 1.993 | AI169398  | Cholesterol 25-hydroxylase                                                            | Ch25h                |
| 1.990 | BE098463  | Ubiquitin specific protease 43 (predicted)                                            | Usp43_predicted      |

|       |           |                                                                                                                                        |                      |
|-------|-----------|----------------------------------------------------------------------------------------------------------------------------------------|----------------------|
| 1.984 | BE116152  | ELOVL family member 6, elongation of long chain fatty acids (yeast)                                                                    | Elovl6               |
| 1.980 | NM_013126 | Diacylglycerol kinase, gamma                                                                                                           | Dgkg                 |
| 1.977 | NM_133306 | Oxidized low density lipoprotein (lectin-like) receptor 1                                                                              | Oldlr1               |
| 1.976 | AW916358  | Serine palmitoyltransferase, long chain base subunit 1 (predicted)                                                                     | Sptlc1_predicted     |
| 1.975 | BF406975  | Thioredoxin domain containing 12 (endoplasmic reticulum)                                                                               | Txndc12              |
| 1.972 | AI104303  | Hypothetical LOC314467 (predicted)                                                                                                     | RGD1305627_predicted |
| 1.969 | NM_080481 | ATP synthase, H <sup>+</sup> transporting, mitochondrial F0 complex, subunit e                                                         | Atp5i                |
| 1.969 | BF408445  | Glutathione peroxidase 7 (predicted)                                                                                                   | Gpx7_predicted       |
| 1.968 | BF290998  | Ubiquinol cytochrome c reductase core protein 2                                                                                        | Uqcrc2               |
| 1.967 | NM_031347 | Peroxisome proliferative activated receptor, gamma, coactivator 1 alpha                                                                | Ppargc1a             |
| 1.967 | AI176913  | Phosphoglucomutase 1 (predicted)                                                                                                       | Pgm1_predicted       |
| 1.964 | NM_031987 | Carnitine O-octanoyltransferase                                                                                                        | Crot                 |
| 1.963 | BI296347  | Acyl-Coenzyme A dehydrogenase family, member 11 (predicted)                                                                            | Acad11_predicted     |
| 1.958 | NM_019354 | Uncoupling protein 2 (mitochondrial, proton carrier)                                                                                   | Ucp2                 |
| 1.958 | AI535136  | Hydroxyacyl-Coenzyme A dehydrogenase/3-ketoacyl-Coenzyme A thiolase/enoyl-Coenzyme A hydratase (trifunctional protein), alpha subunit* | Hadha*               |
| 1.957 | AI145761  | Lactate dehydrogenase D                                                                                                                | Ldhd                 |
| 1.957 | BF394106  | Tumor necrosis factor (ligand) superfamily, member 9                                                                                   | Tnfsf9               |
| 1.956 | NM_012891 | Acyl-Coenzyme A dehydrogenase, very long chain*                                                                                        | Acadvl*              |
| 1.955 | AI137547  | Transcribed locus, weakly similar to XP_125510.6<br>PREDICTED: hypothetical                                                            |                      |

|       |           |                                                                                                                    |                      |
|-------|-----------|--------------------------------------------------------------------------------------------------------------------|----------------------|
|       |           | protein LOC73112 [Mus musculus]                                                                                    |                      |
| 1.954 | L09653    | Transforming growth factor, beta receptor II                                                                       | Tgfr2                |
| 1.952 | AW522833  | Transcribed locus                                                                                                  |                      |
| 1.951 | BI298434  | Transcribed locus, strongly similar to XP_236967.3<br>PREDICTED: similar to OTTHUMP00000039916 [Rattus norvegicus] |                      |
| 1.946 | NM_031682 | Hydroxyacyl-Coenzyme A dehydrogenase type II                                                                       | Hadh2                |
| 0.542 | BF413560  | Transcribed locus                                                                                                  |                      |
| 0.511 | AI011920  | RCS domain containing 1 (predicted)                                                                                | Rcsd1_predicted      |
| 0.484 | BF392830  | Contactin associated protein 1                                                                                     | Cntnap1              |
| 0.478 | NM_053669 | Adaptor protein with pleckstrin homology and src homology 2 domains                                                | Aps                  |
| 0.476 | NM_133570 | Gastrin releasing peptide                                                                                          | Grp                  |
| 0.461 | BI296374  | Transcribed locus                                                                                                  |                      |
| 0.432 | BM388888  | Similar to SUN2 (predicted)                                                                                        | RGD1563141_predicted |
| 0.348 | BE349836  | Transcribed locus                                                                                                  |                      |
| 0.345 | NM_031557 | Prostaglandin I2 (prostacyclin) synthase                                                                           | Ptgis                |
| 0.308 | AA996557  | Similar to immunoglobulin heavy chain 6 (Igh-6)                                                                    | RGD1359202           |
| 0.257 | AI230591  | Similar to cta-2-beta protein (141 AA) (predicted)                                                                 | RGD1565540_predicted |
| 0.242 | BI288825  | Ankyrin repeat domain 1 (cardiac muscle)                                                                           | Ankrd1               |
| 0.134 | NM_017341 | Lipase, gastric                                                                                                    | Lipf                 |
| 0.081 | AF290212  | Calcium channel, voltage-dependent, T type, alpha 1G subunit                                                       | Cacna1g              |
| 0.077 | AI535458  | Rcd1 (required for cell differentiation) homolog 1 (S. pombe)                                                      | Rqcd1                |
| 0.073 | AW521327  | Transcribed locus                                                                                                  |                      |
| 0.072 | AA957487  | Similar to novel protein (predicted)                                                                               | RGD1561932_predicted |

\* represents genes that were also identified as ERR $\alpha$  targets by others through expression array or ChIP-on-Chip (13, 29).
